# Supplementary material for: Enhanced Carbapenem Resistance through Multimerization of Plasmids Carrying Carbapenemase Genes
Source: PubMed Central journal article supplement (PMC8262910; doi:10.1128/mbio.00186-21), 2021-06-22
Supplement: mbio.00186-21-sf002.pdf [file mbio.00186-21-sf002.pdf]

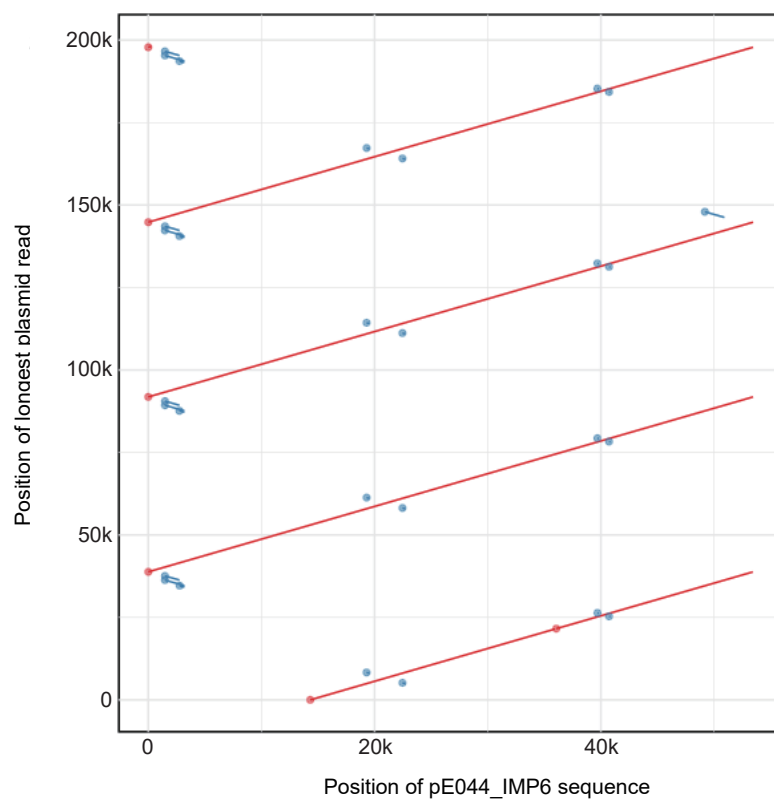

**FIG S2. Plasmid multimerization observed by MinION.** The longest read (198 kb) obtained from ultra-long sequencing of isolate E044 was mapped 3.7 times serially to pE044\_IMP6 (53 kb) in the forward strand. The colors of the lines show strand direction of the longest read (198 kb) compared with pE044\_IMP6, as forward (red) and reverse (blue).
