# Supplementary material for: Enhanced Carbapenem Resistance through Multimerization of Plasmids Carrying Carbapenemase Genes
Source: PubMed Central journal article supplement (PMC8262910; doi:10.1128/mbio.00186-21), 2021-06-22
Supplement: mbio.00186-21-sf003.pdf [file mbio.00186-21-sf003.pdf]

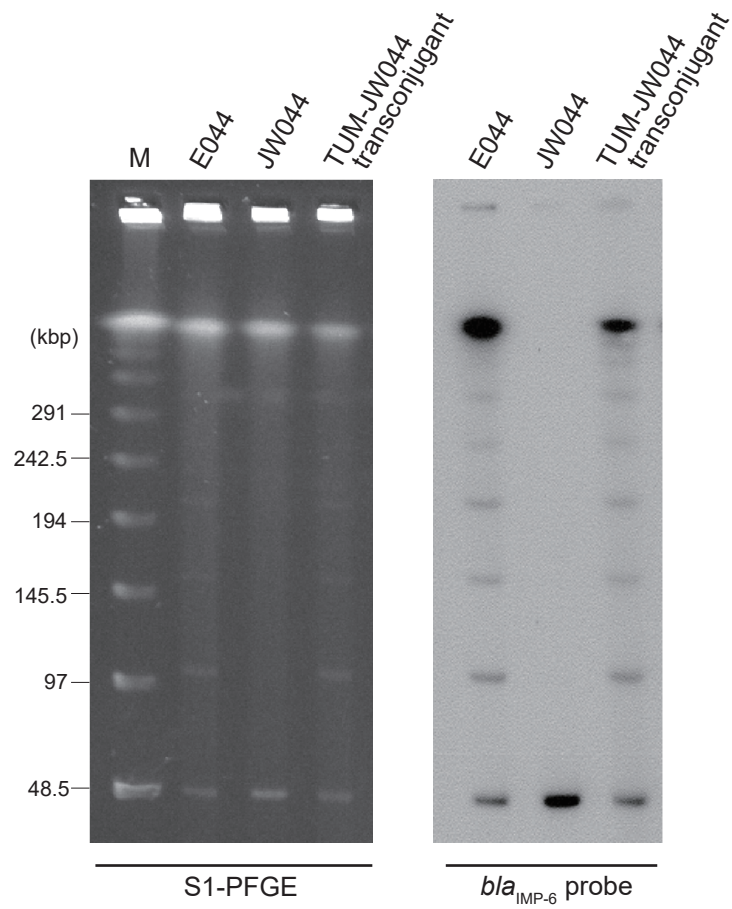

**FIG S3 Reproducibility of multimer patterns.** The ladder band on Southern blotting with *bla*<sub>IMP-6</sub> probe following S1-PFGE in isolate E044 changed into single band after conjugation into *recA*-negative *E. coli* isolate JW044. The plasmid in JW044 was further conjugated into TUM3456 *E. coli* isolate with wildtype *recA*, indicated as TUM-JW044 transconjugant. The ladder band was observed on Southern blotting hybridization with *bla*<sub>IMP-6</sub> probe following S1-PFGE in TUM-JW044 transconjugant.
