# Supplementary material for: Enhanced Carbapenem Resistance through Multimerization of Plasmids Carrying Carbapenemase Genes
Source: PubMed Central journal article supplement (PMC8262910; doi:10.1128/mbio.00186-21), 2021-06-22
Supplement: mbio.00186-21-sf004.pdf [file mbio.00186-21-sf004.pdf]

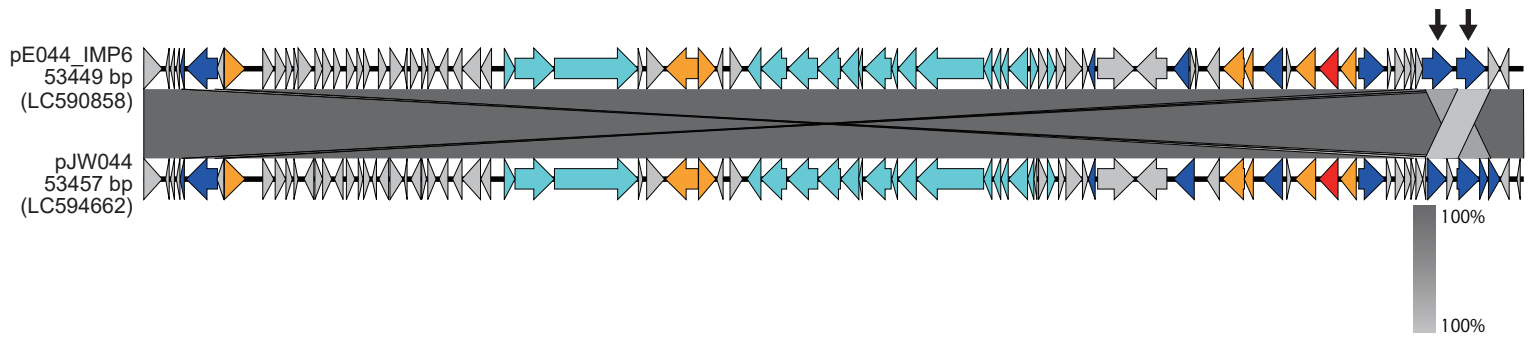

**FIG S4 Comparison of the genome structures of plasmids pE044\_IMP6 and pJW044.** Plasmid pJW044 in *recA*-deficient transformant JW044, which was not multimerized, was compared with the original plasmid pE044\_IMP6. The consecutive transposases likely targeted for homologous recombination leading to multimerization are indicated by arrows. The color code is as follows: red, carbapenem resistance gene; yellow, other antimicrobial resistance gene; light blue, conjugative transfer gene; blue, mobile element. Putative, hypothetical, or unknown genes are represented as grey arrows.
