# Supplementary material for: Enhanced Carbapenem Resistance through Multimerization of Plasmids Carrying Carbapenemase Genes
Source: PubMed Central journal article supplement (PMC8262910; doi:10.1128/mbio.00186-21), 2021-06-22
Supplement: mbio.00186-21-sf005.pdf [file mbio.00186-21-sf005.pdf]

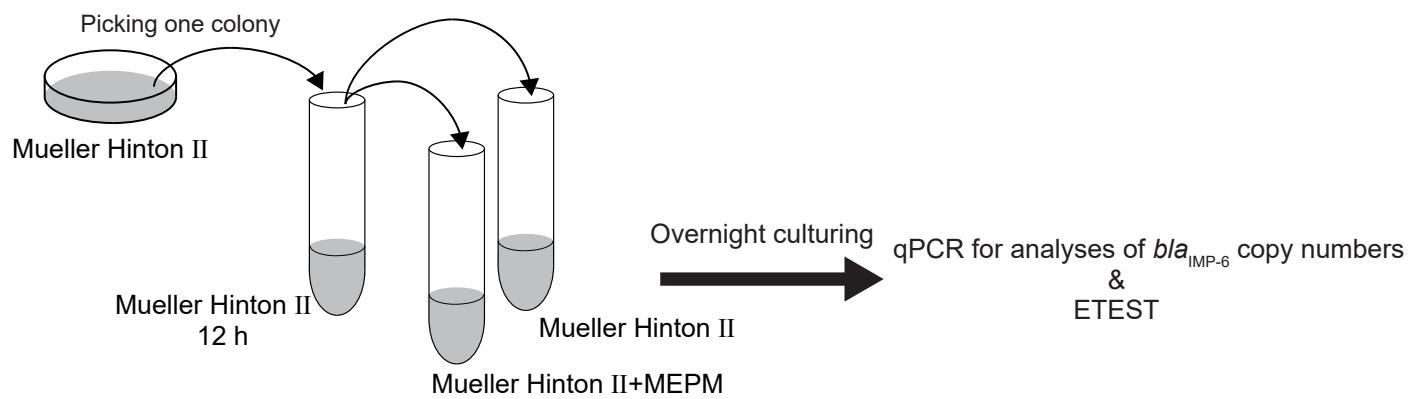

**FIG S5. Schematic procedure of meropenem pre-exposure.**
