# Supplementary material for: Enhanced Carbapenem Resistance through Multimerization of Plasmids Carrying Carbapenemase Genes
Source: PubMed Central journal article supplement (PMC8262910; doi:10.1128/mbio.00186-21), 2021-06-22
Supplement: mbio.00186-21-sf006.pdf [file mbio.00186-21-sf006.pdf]

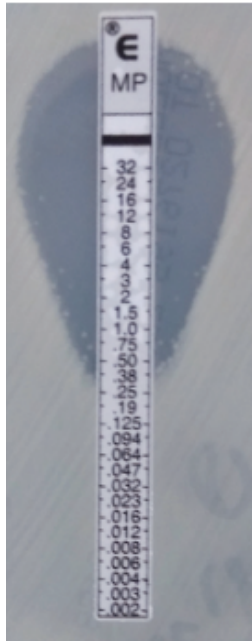

without meropenem

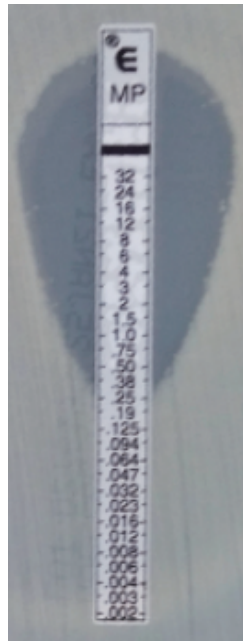

with meropenem

ME188

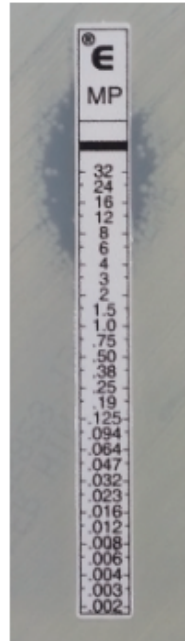

without meropenem

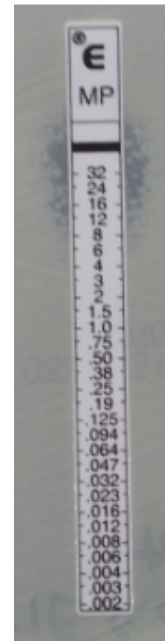

with meropenem

ME044

**FIG S6 Emergence of enhanced meropenem resistant clone through meropenem exposure.**

Meropenem MICs of isolates ME188 and ME044 with or without meropenem exposure were measured by ETEST.
